# Supplementary material
Source: PubMed Central journal article supplement (PMC7028977)
Supplement: AEM.01950-19-s0001.pdf [file AEM.01950-19-s0001.pdf]

**A**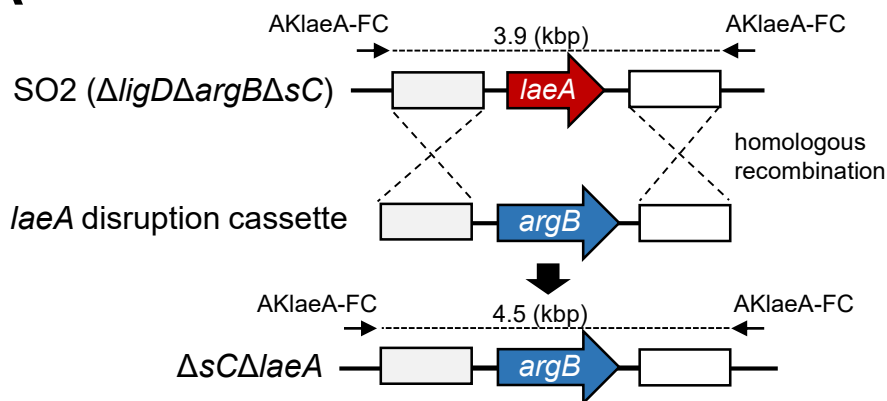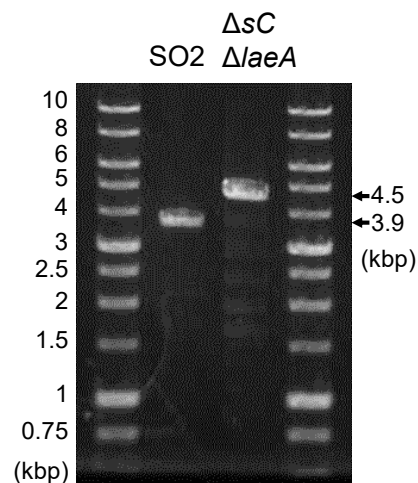**B**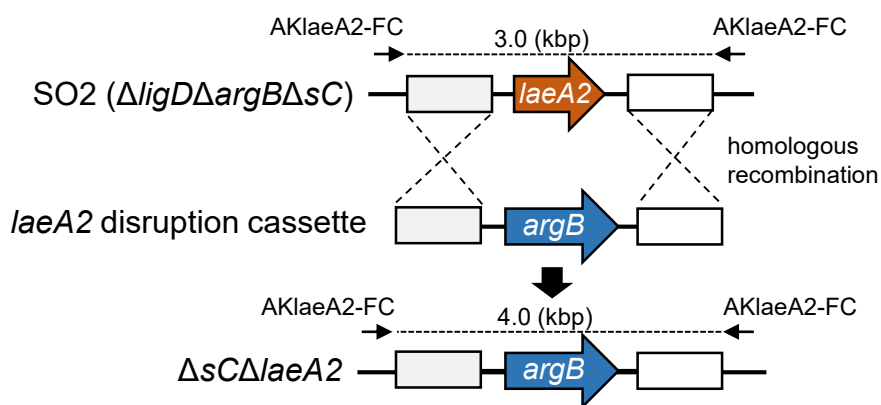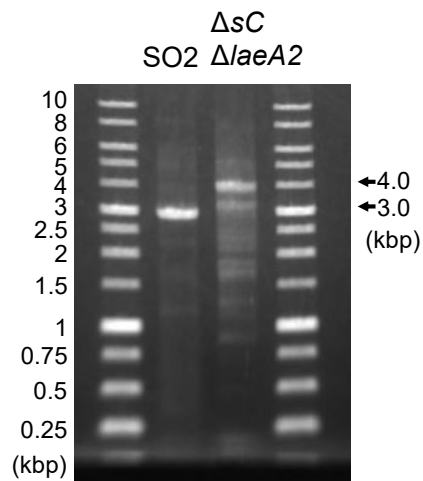**C**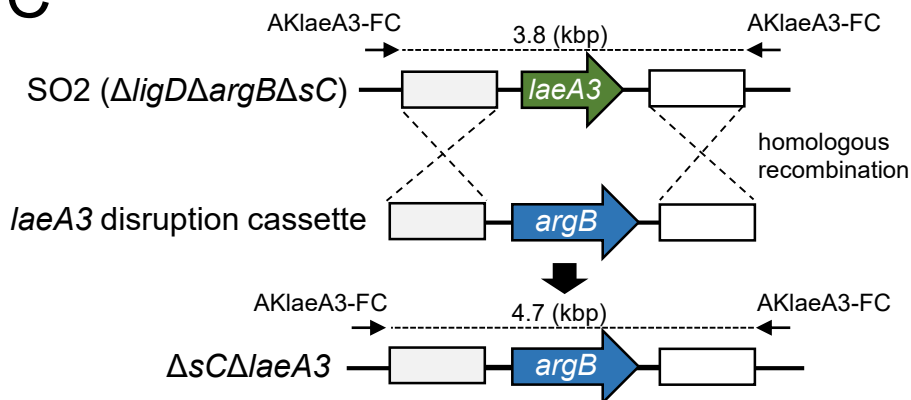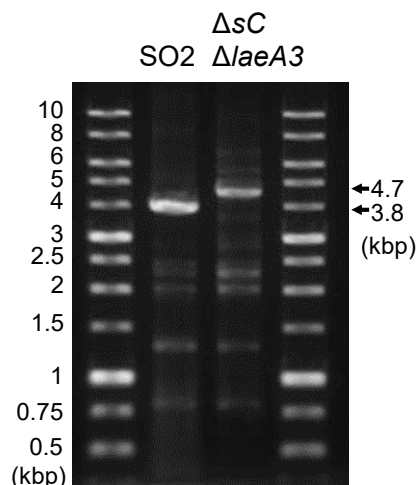

**Fig. S1.** Construction of *A. kawachii* *LaeA*-like methyltransferase encoding genes. Schematic representation of the disruption of *laeA* (A), *laeA2* (B), and *laeA3* (C) by the insertion of *argB*. Agarose gel electrophoresis of PCR amplicons to confirm the disruption of *laeA*, *laeA2*, and *laeA3* was shown in the panels on the right.

**A**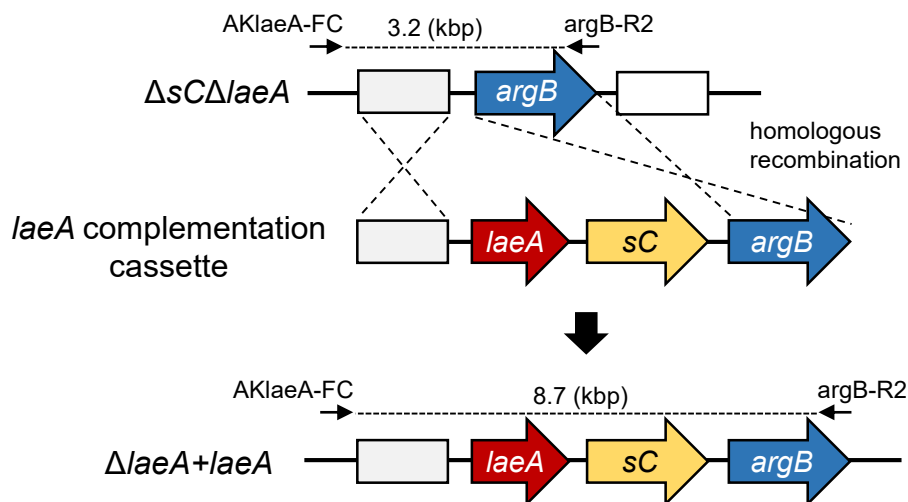**B**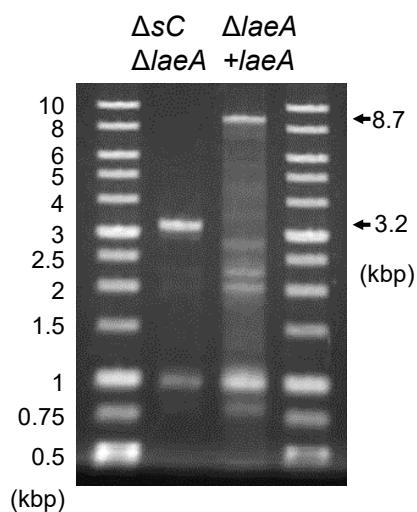

**Fig. S2** Construction of *A. kawachii*  $\Delta laeA + laeA$  strain. Schematic representation of the complementation of *laeA* (A). Agarose gel electrophoresis of PCR amplicons to confirm the complementation of *laeA* (B).

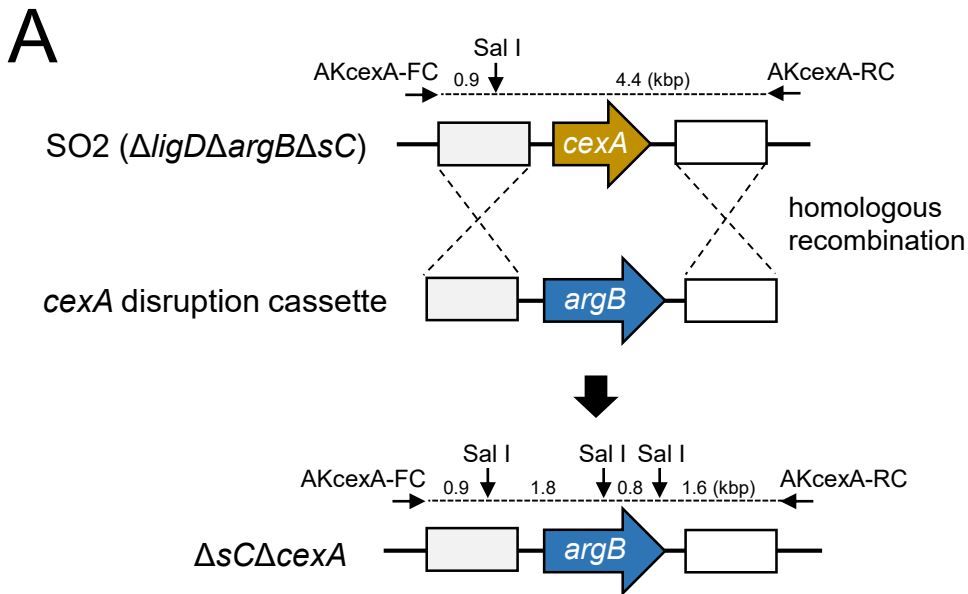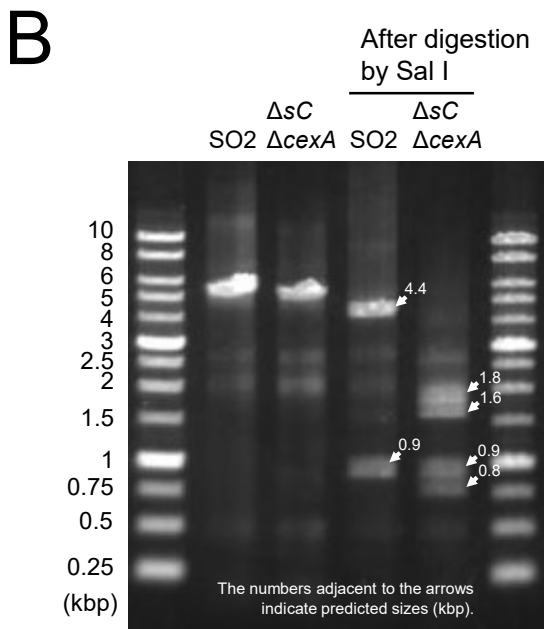

**Fig. S3.** Construction of *A. kawachii* putative citrate exporter encoding gene. Schematic representation of the disruption of *cexA* by the insertion of *argB* (A). Agarose gel electrophoresis of PCR amplicons to confirm the disruption of *cexA* (B).
